# Supplementary material
Source: PubMed Central journal article supplement (PMC3157220)
Supplement: mmc1.pdf [file mmc1.pdf]

EWS/FLI1

GAPDH

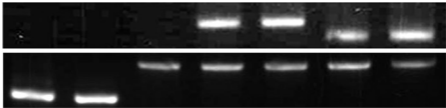

mouse (control)

mouse spleen (control)

mouse liver

293 cell (control)

RD-ES cell

RD-ES xenograft tumor

TC-71 cell

TC-71 xenograft tumor
