# Supplementary material
Source: PubMed Central journal article supplement (PMC3157220)

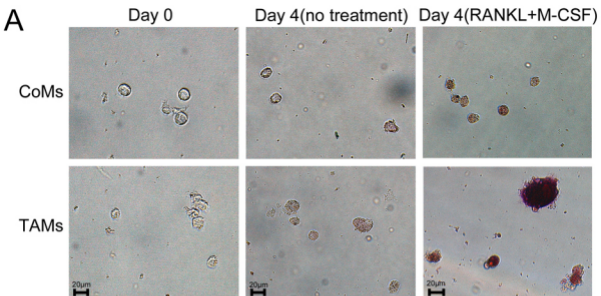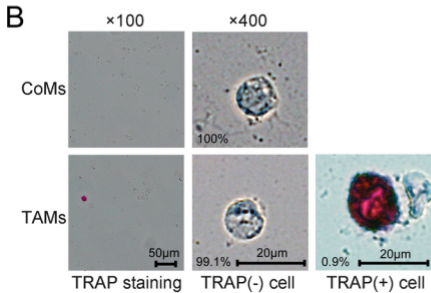

Supplement: mmc2.pdf [file mmc2.pdf]

CD14

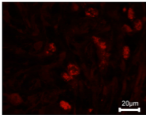

CD68

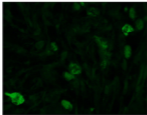

DAPI

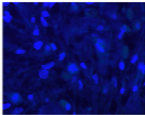

Merge

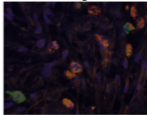

Supplement: mmc3.pdf [file mmc3.pdf]
